# Supplementary material for: Adsorption behavior of carbon dots on La3+ and the multiple effects on the growth of mung bean seedlings under La3+ stress
Source: Royal Society of Chemistry journal article supplement (doi:10.1039/d4en00530a), 2024-10-19
Supplement: d4en00530a1.pdf [file d4en00530a1.pdf]

## Supplementary Tables

Table S1. Primers used for qRT-PCR validation

| Transcript ID |   | Primer Sequence           |
|---------------|---|---------------------------|
| Rna15138      | F | ATCTCACAGAAGGTTGCTGCTTGG  |
|               | R | AGTCCTTCTACTCCCTAGATGGTTG |
| Rna17727      | F | TCCCATCTCCATCTTCTTCCCTCAG |
|               | R | GTGTGCTCCAGATAAGGCTACCATG |
| Rna17731      | F | AAGCCCTCTCCATCATCAGATCCTC |
|               | R | CAGAACAGAAGCGTCACATCCATTG |
| Ran19869      | F | AACTCAGACGAAGTGCTTCTTGTTG |
|               | R | GAATCCAGTGAGAGGACGAAGGTTG |
| Ran26850      | F | TGCCAACACCTCCCTTCCTTCTC   |
|               | R | AATTGACATTGCGAACGACCAAAGG |
| Ran45674      | F | GTTGGATGAAATGGTGACGCTGTTG |
|               | R | CATATTGGGGTCGTTGAGCCTGTC  |
| Rna44057      | F | TCCGCTTGTTCTTCCACGATTGC   |
|               | R | TCCTGTTGGGGTTTGCGTTCTTC   |
| Ran35220      | F | TGCTTGGAACACTACACTGCTTCTC |
|               | R | GCATACGAGGATCAGACTGGGAAAC |
| Ran39145      | F | CAGACGCTGTTACCTCTCAATCC   |
|               | R | CCGTTGGAAGCAGTGAGGACATC   |
| Rna45348      | F | GGGCTGTGAGGGTTCTGTGTTG    |
|               | R | CTTGGGTTGTTGGCAGGATGGTC   |

**Table S2. Quality inspection results of transcriptome samples**

| Sample ID | Tissue | RNA concentration (ng/ $\mu$ L) | Volume ( $\mu$ g) | OD260/280 | OD260/230 | Results |
|-----------|--------|---------------------------------|-------------------|-----------|-----------|---------|
| A1        | root   | 504.80                          | 17.67             | 2.08      | 1.41      | A       |
| A2        | root   | 310.90                          | 10.88             | 2.16      | 1.89      | A       |
| A3        | root   | 444.40                          | 15.55             | 2.12      | 1.94      | A       |
| B1        | root   | 424.50                          | 14.86             | 2.13      | 1.89      | A       |
| B2        | root   | 326.50                          | 11.43             | 2.15      | 1.89      | A       |
| B3        | root   | 307.50                          | 10.76             | 2.17      | 1.83      | A       |
| C1        | root   | 200.30                          | 7.01              | 2.21      | 1.25      | A       |
| C2        | root   | 438.30                          | 15.34             | 2.13      | 1.81      | A       |
| C3        | root   | 310.30                          | 10.86             | 2.17      | 1.59      | A       |
| D1        | root   | 321.30                          | 11.25             | 2.19      | 1.32      | A       |
| D2        | root   | 291.50                          | 10.20             | 2.18      | 1.42      | A       |
| D3        | root   | 512.60                          | 17.94             | 2.08      | 2.01      | A       |

## Supplementary Figures

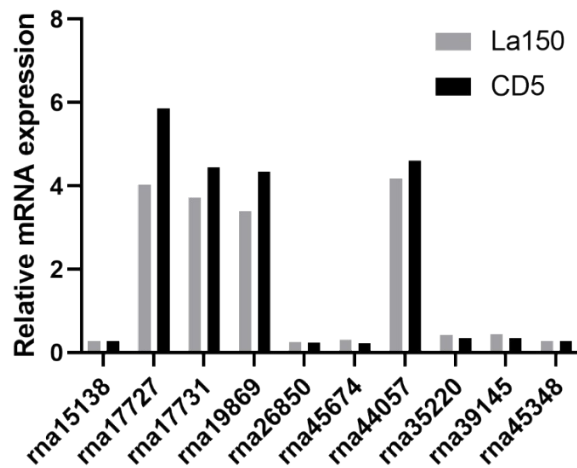

**Fig. S1. qRT-PCR validation results of RNA-seq (Peroxidase-related genes; Liaolv 28).** Note: CD5 means 0.05mg/ mL C-CDs treated mung bean seedling, La150 means 150 $\mu$ mol/L LaCl<sub>3</sub> treated mung bean seedling

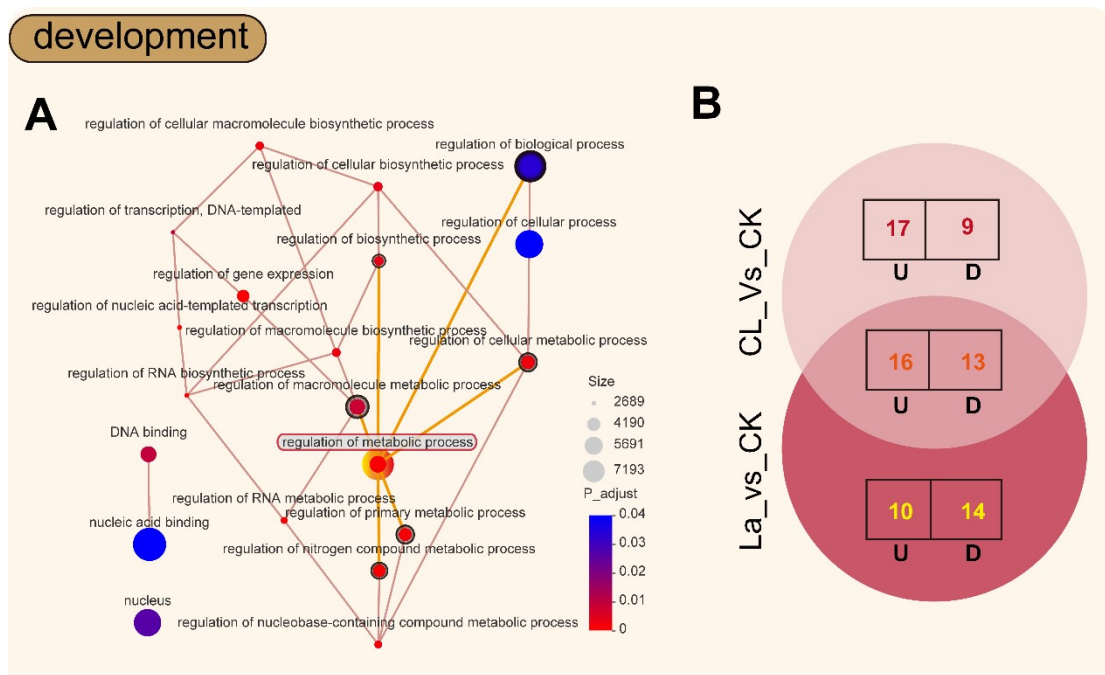

**Fig.S2. Functional network analysis (A) and Venn diagram of development related genes (B).**

Note: “U” in B means up regulates, and “D” means down regulates.

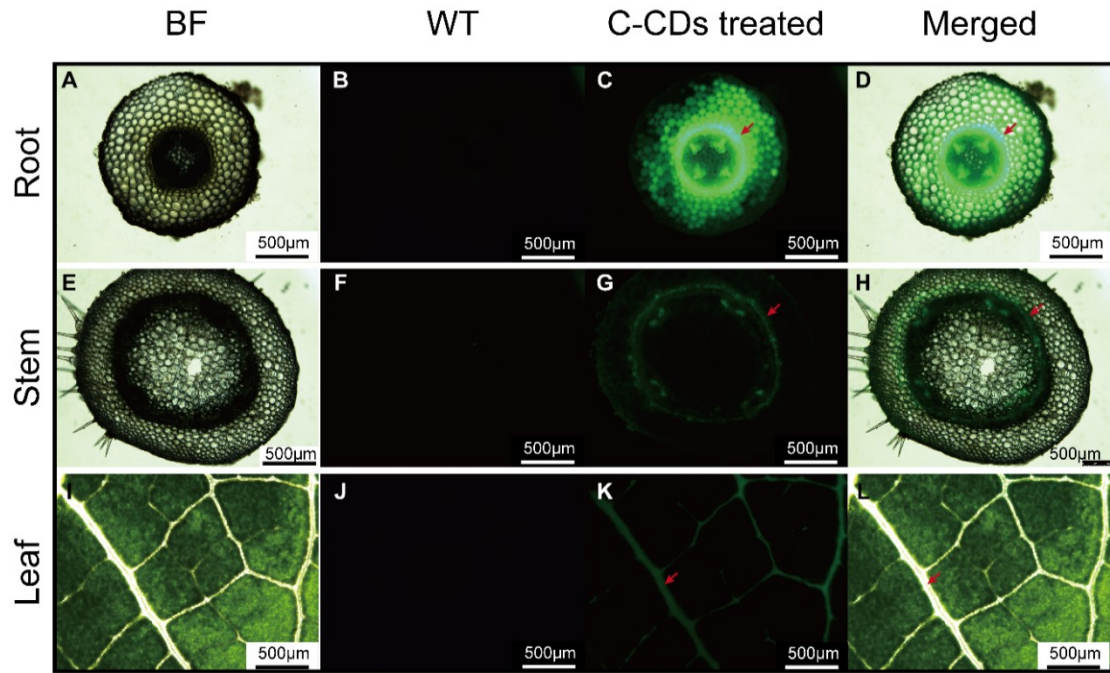

**Fig. S3 Fluorescence microscopy observation of Mung bean seeding.** Note: A~D: root; E~H: stem; I~L: leaf. A, E, I are seeding section under bright light; B, F, J are sections of Control group under the 500-550nm excite fluorescence; C, G, K are sections of C-CDs treated group under the 500-550nm excite fluorescence. D, H, L are merged image of BF and fluorescence view.

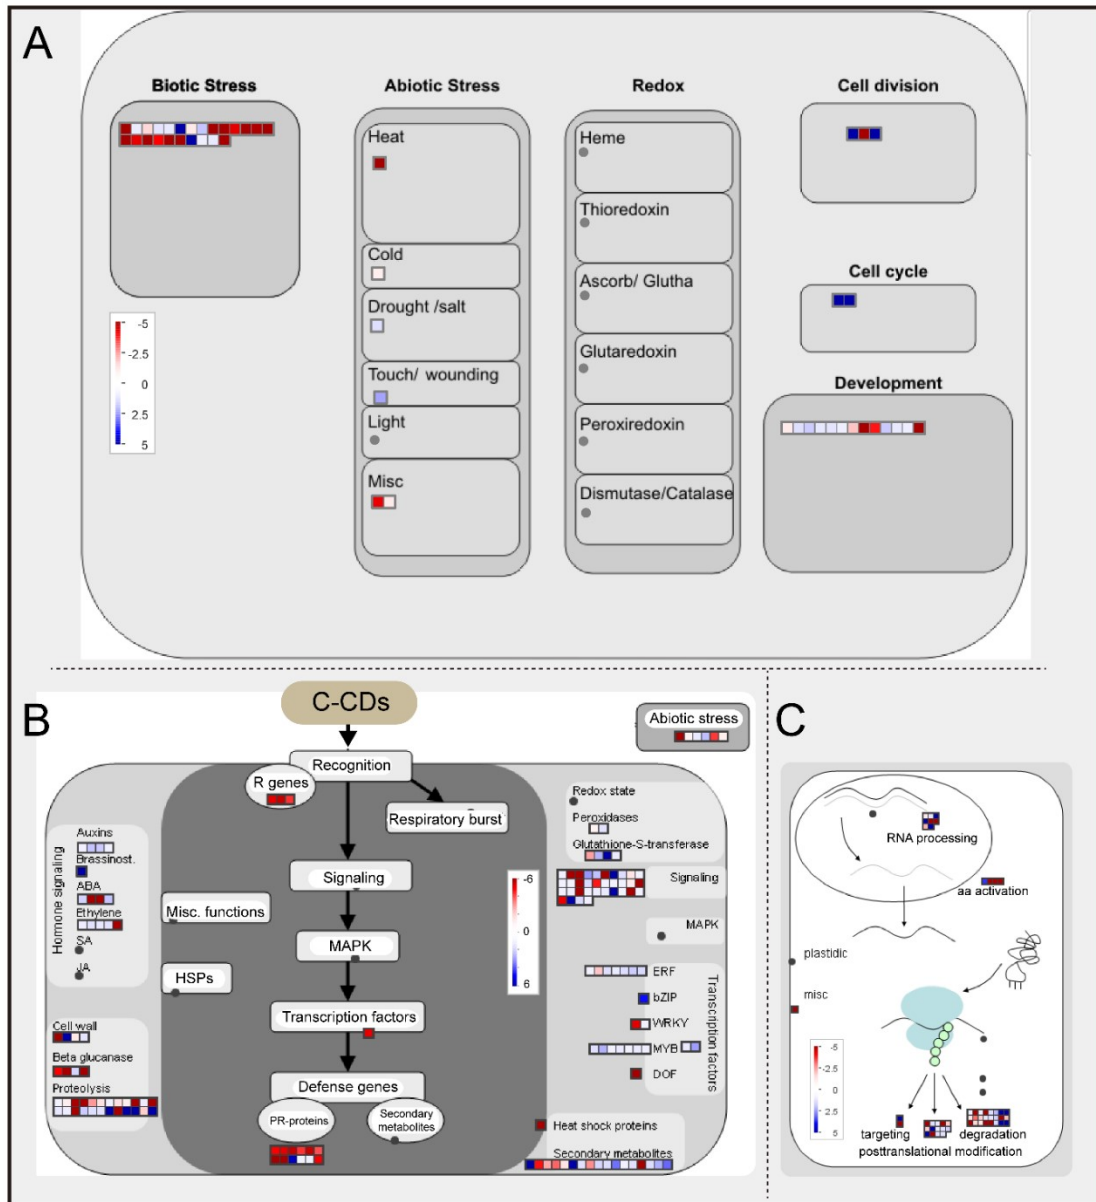

**Fig. S4. Effect of C-CDs treatment on cell response (A), stress (B) and protein synthesis of RNA\_Protein**

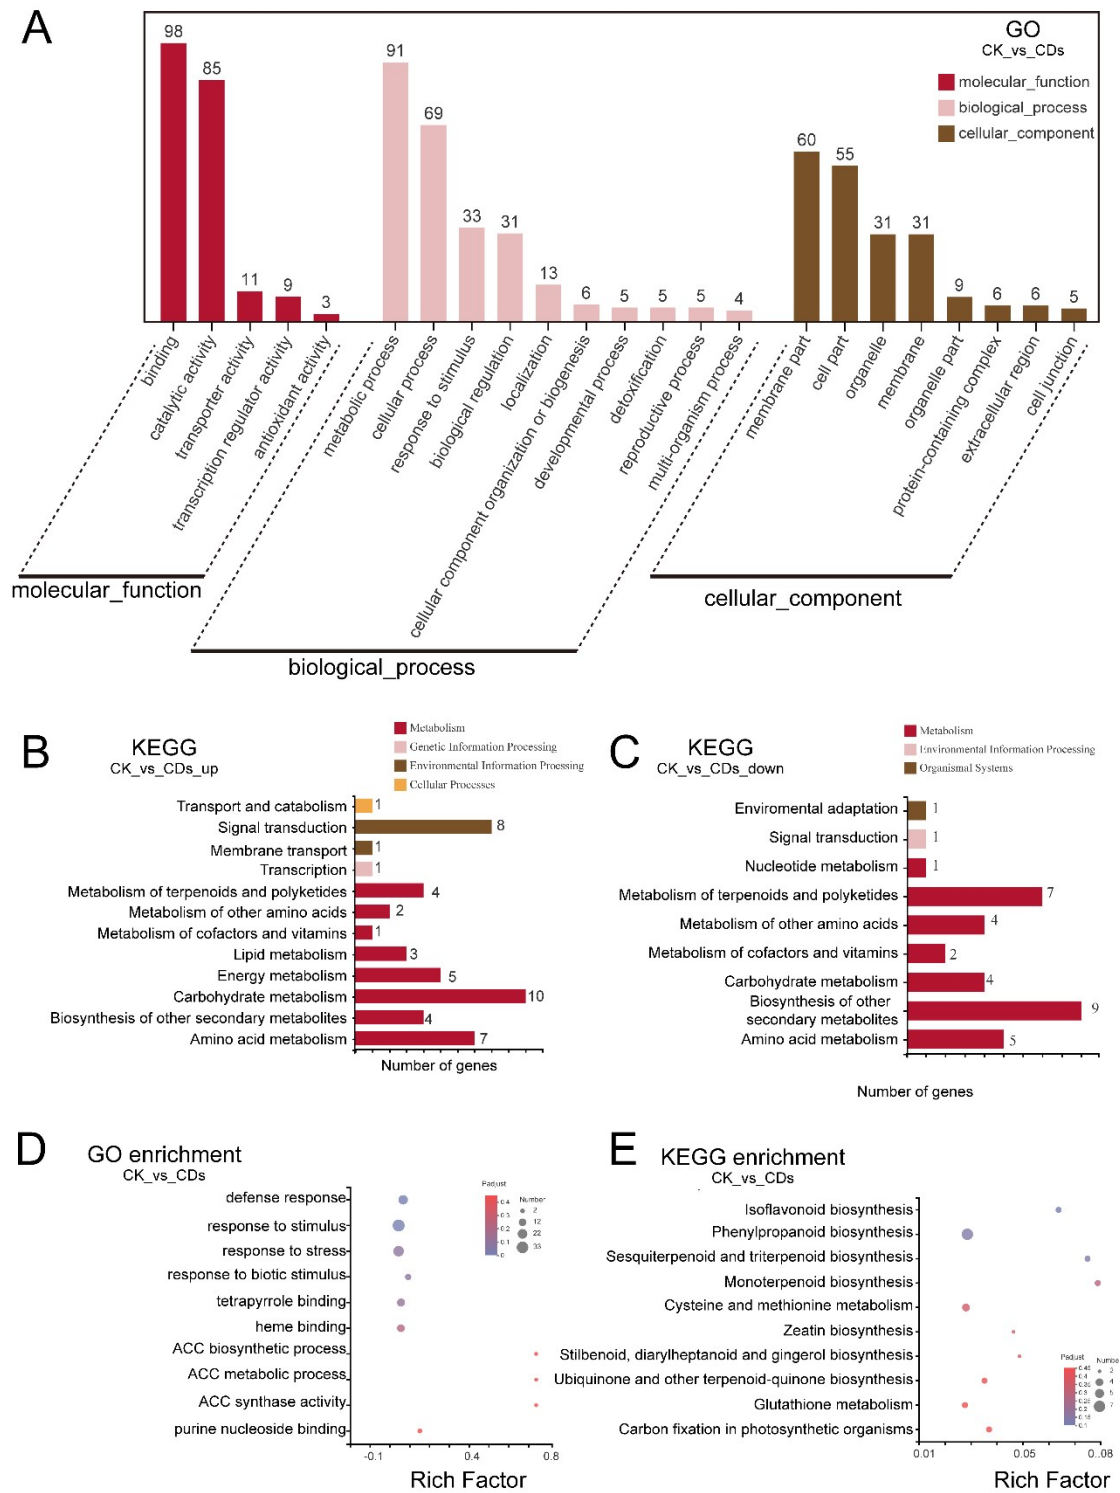

**Fig. S5. GO functional annotation (A) and functional enrichment (D), KEGG functional annotation (B, C) and functional enrichment (E) in CDs treatment group**

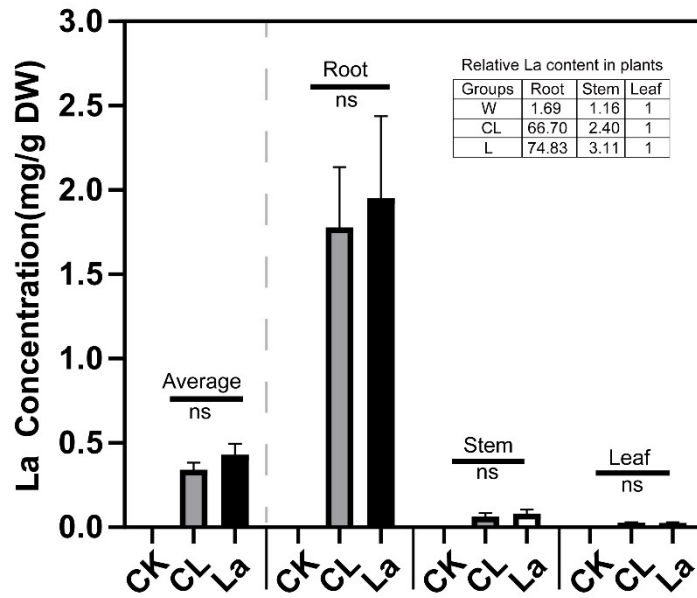

**Fig. S6. Total La content of the mung bean seedling.** Note: mung bean seedling in CK, CL, La groups were treated with water (CK), 30  $\mu\text{mol/L}$  La (La30), 60  $\mu\text{mol/L}$  La (La60), 0.01 mg/ml C-CDs+30  $\mu\text{mol/L}$  La (CL), respectively. Different uppercase letters (a, b, c) indicated significant differences between different treatment groups, and “ns” represent no significant difference ( $P < 0.05$ ).

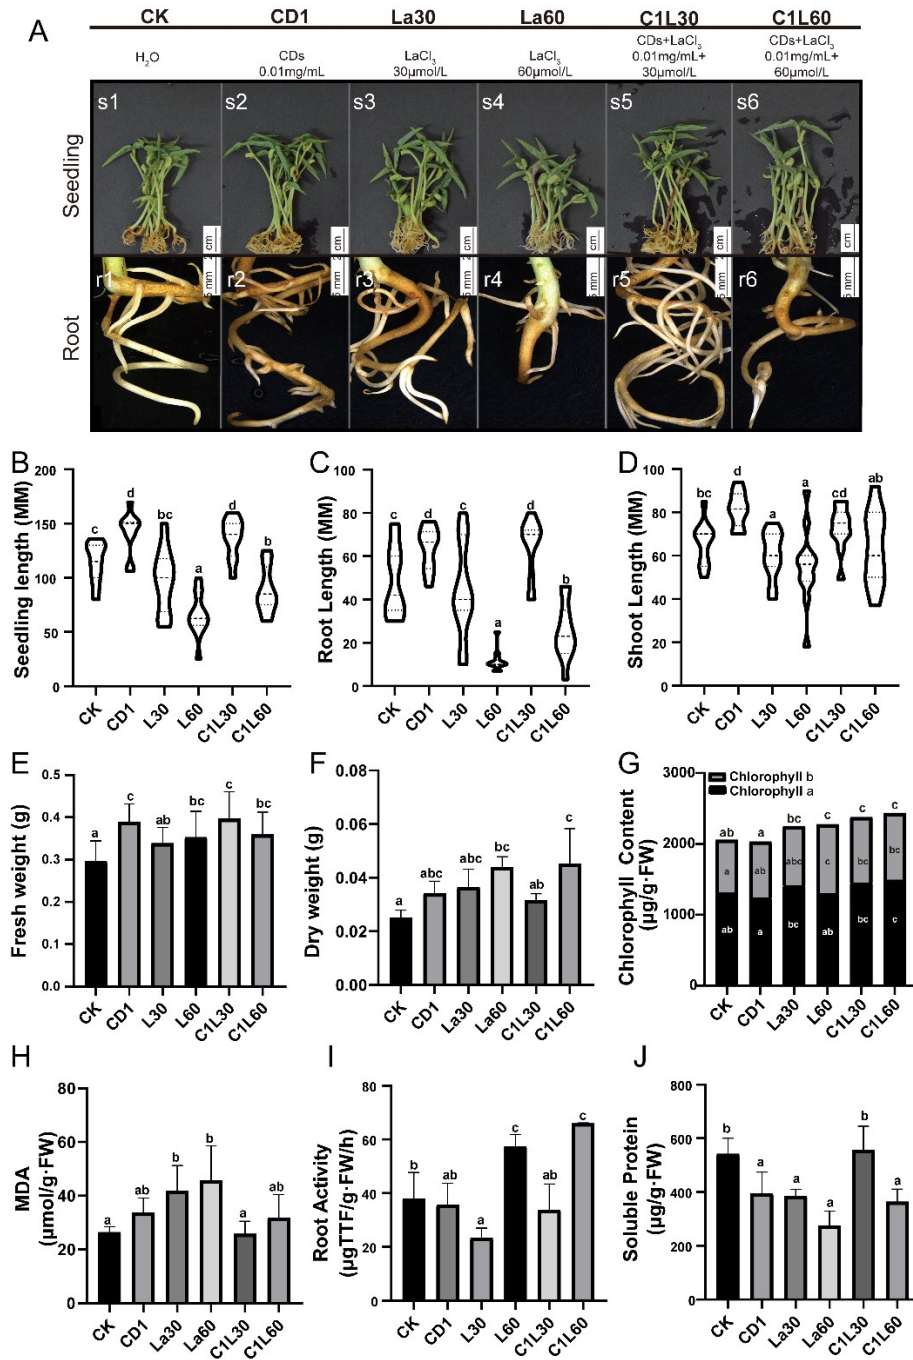

**Fig. S7. Effect of C-CDs on La treated mung bean seedling.** Note: Morphology (A), Seedling length (B), root length (C), shoot length (D), Fresh weight (E), Dry weight (F), chlorophyll content (G), MDA content (H), root activity (I), and soluble protein (J) of mung bean seedling treated with water (CK), 0.01 mg/ml C-CDs (CD1), 30 μmol/L La (La30), 60 μmol/L La (La60), 0.01 mg/ml C-CDs+30 μmol/L La (C1L30), 0.01mg/ml C-CDs+60 μmol/L La (C1L60); Different uppercase letters (a, b, c) indicated significant differences between different treatment groups, and “ns” represent no significant difference ( $P < 0.05$ ).



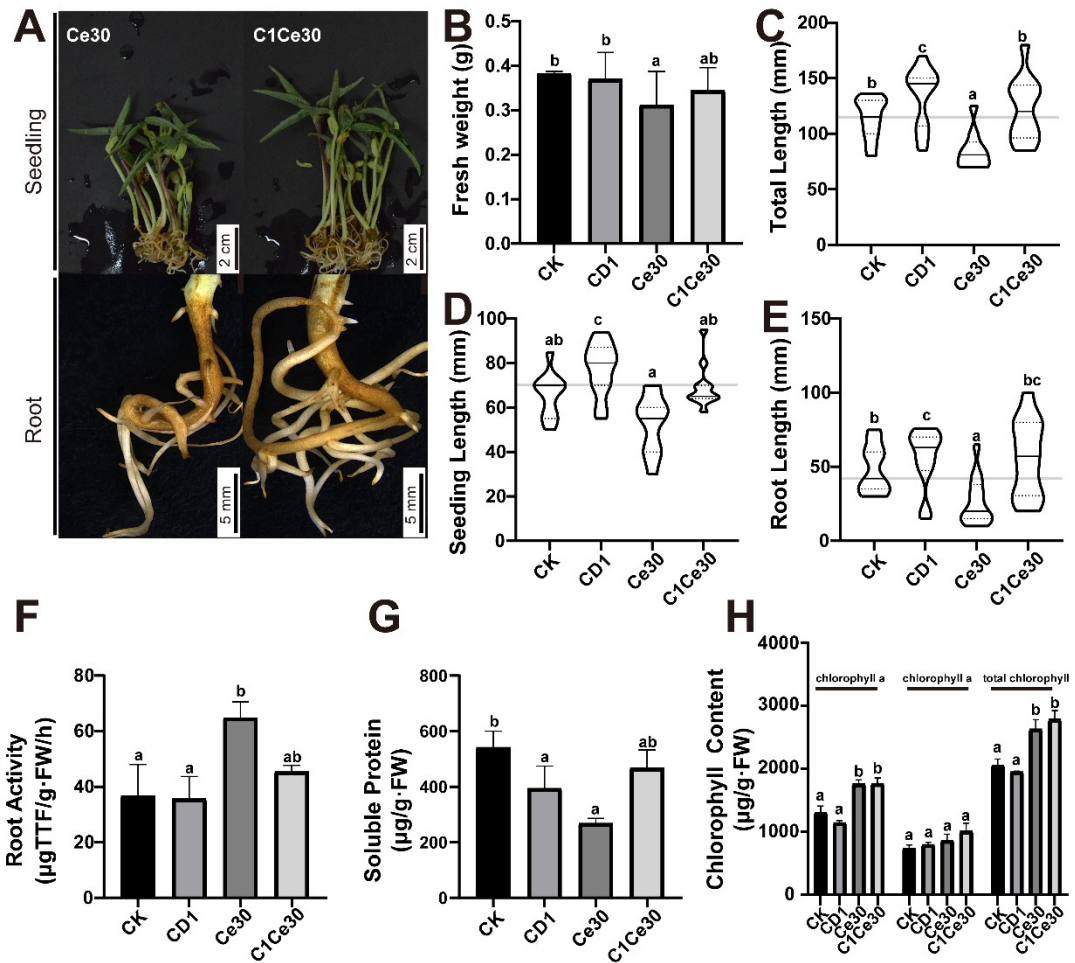

**Fig. S8. Effect of C-CDs on Ce - treated mung bean seedlings.** Note: Morphology (A), fresh weight (B), total length (C), seedling length (D), root length (E), root activity (F), soluble protein (G), and chlorophyll content of mung bean seedlings. Different uppercase letters (a, b, c) indicated significant differences between different treatments ( $P < 0.05$ ).

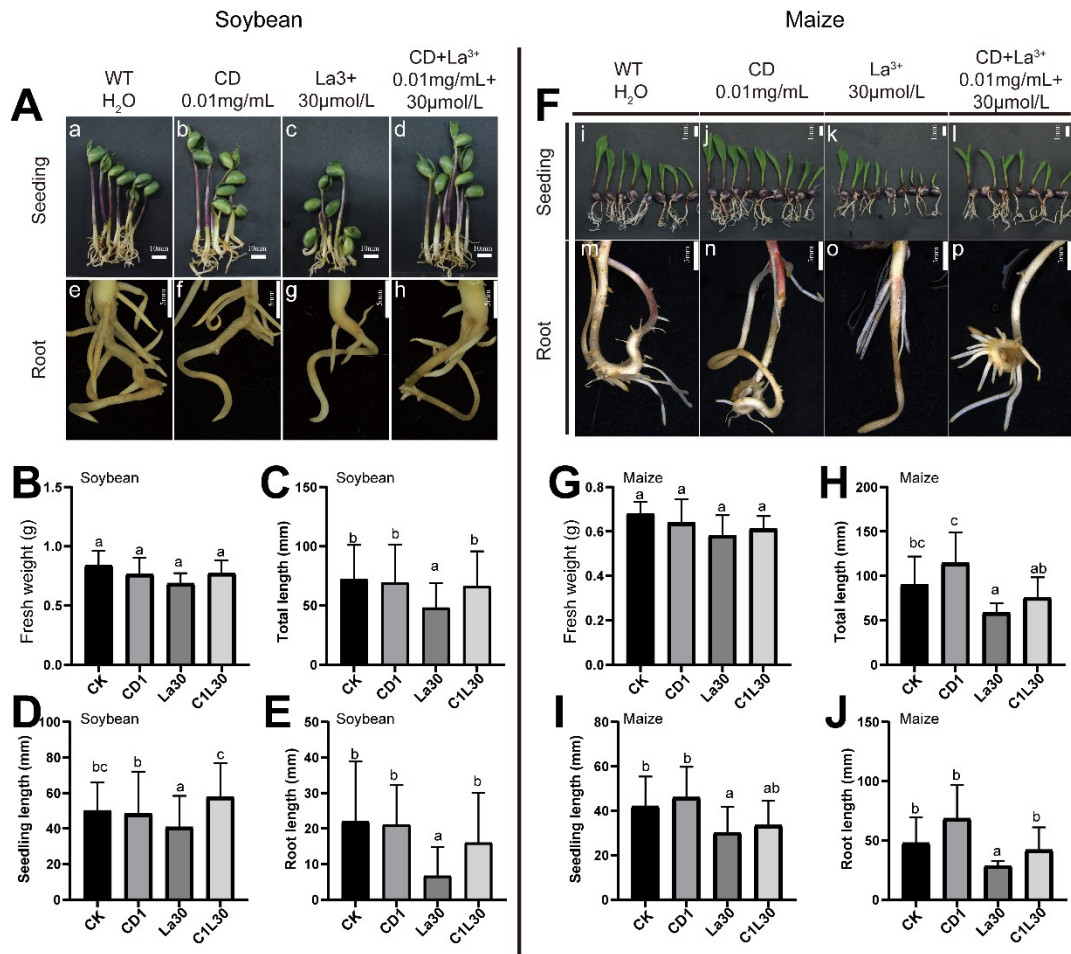

**Fig. S9. Effect of C-CDs on La treated soybean and maize seedlings.** Note: Morphology (A), fresh weight (B), total length (C), seedling length (D), and root length (E) of soybean seedlings; morphology (F), fresh weight (G), total length (H), seedling length (I), and root length (J) of maize seedlings. Different uppercase letters (a, b, c) indicated significant differences between treatments ( $P < 0.05$ ).

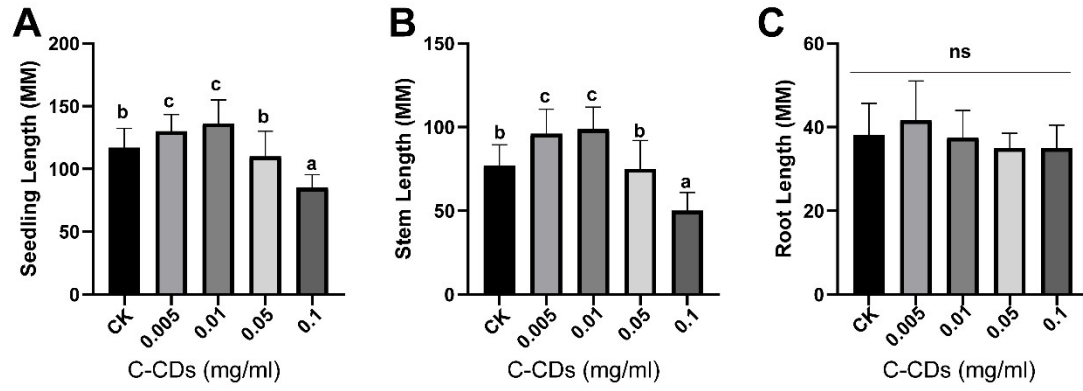

**Fig. S10. Effect of C-CDs on the seedling length (A), stem length (B), Root length (C) of mung bean.** Different uppercase letters (a, b, c) indicated significant differences between treatments ( $P < 0.05$ ).
